# Supplementary material for: Evaluation of effect of cooled haemodialysis on cognition in patients with end-stage kidney disease (ECHECKED) feasibility randomised controlled trial results
Source: PubMed Central journal article supplement (PMC11657600; doi:10.1186/s12882-024-03883-6), 2024-12-19
Supplement: 12882_2024_3883_MOESM1_ESM.pdf [file 12882_2024_3883_MOESM1_ESM.pdf]

Supplemental Material

Supplemental Table 1: Schedule of events in ECHECKED trial

Supplemental Box 1: Questionnaire to assess patient experience of low temperature dialysis

**Table 1: Schedule of events in ECHECKED Trial**

|                                                                                                                                                                                                                                                                                                                                                                                                                                                                                                                                   | Baseline (0 month)                       | 6 months | 12 months                 |
|-----------------------------------------------------------------------------------------------------------------------------------------------------------------------------------------------------------------------------------------------------------------------------------------------------------------------------------------------------------------------------------------------------------------------------------------------------------------------------------------------------------------------------------|------------------------------------------|----------|---------------------------|
| Consent                                                                                                                                                                                                                                                                                                                                                                                                                                                                                                                           | X                                        |          |                           |
| Randomisation                                                                                                                                                                                                                                                                                                                                                                                                                                                                                                                     | X                                        |          |                           |
| Baseline data (defined)                                                                                                                                                                                                                                                                                                                                                                                                                                                                                                           | X                                        |          |                           |
| Cognitive function:                                                                                                                                                                                                                                                                                                                                                                                                                                                                                                               |                                          |          |                           |
| Montreal Cognitive Assessment <sup>31</sup>                                                                                                                                                                                                                                                                                                                                                                                                                                                                                       | X                                        | X        | X                         |
| Cogstate <sup>32</sup>                                                                                                                                                                                                                                                                                                                                                                                                                                                                                                            | X                                        | X        | X                         |
| Confusion Assessment Method <sup>33</sup>                                                                                                                                                                                                                                                                                                                                                                                                                                                                                         | X                                        | X        | X                         |
| Tolerability of Low Temperature Dialysis Questionnaire                                                                                                                                                                                                                                                                                                                                                                                                                                                                            | Every two weeks for the first 6 weeks    |          |                           |
| Activities of daily living: Assessment of QoL <sup>34</sup>                                                                                                                                                                                                                                                                                                                                                                                                                                                                       |                                          |          |                           |
| Bristol Activities of Daily Living Scale <sup>35</sup>                                                                                                                                                                                                                                                                                                                                                                                                                                                                            | X<br>X                                   | X<br>X   | X<br>X                    |
| Carer burden assessment <sup>36</sup>                                                                                                                                                                                                                                                                                                                                                                                                                                                                                             | X                                        | X        | X                         |
| Hospital Anxiety and Depression Scale <sup>37</sup>                                                                                                                                                                                                                                                                                                                                                                                                                                                                               | X                                        | X        | X                         |
| HD recovery time <sup>38</sup>                                                                                                                                                                                                                                                                                                                                                                                                                                                                                                    | X                                        | X        | X                         |
| Qualitative interview                                                                                                                                                                                                                                                                                                                                                                                                                                                                                                             |                                          |          | At completion or drop out |
| Dialysis temperature recording                                                                                                                                                                                                                                                                                                                                                                                                                                                                                                    | During each HD session                   |          |                           |
| Physiological measurements*                                                                                                                                                                                                                                                                                                                                                                                                                                                                                                       | During each HD session                   |          |                           |
| Laboratory measurements**                                                                                                                                                                                                                                                                                                                                                                                                                                                                                                         | Measured monthly as part of routine care |          |                           |
| Adverse event reporting                                                                                                                                                                                                                                                                                                                                                                                                                                                                                                           | X                                        | X        | X                         |
| Review Concomitant Medications                                                                                                                                                                                                                                                                                                                                                                                                                                                                                                    | X                                        | X        | X                         |
| <p>*Blood pressure (pre and post HD), intradialytic hypotension, nursing interventions for intradialytic hypotension, intradialytic weight gain over preceding 1 month,<br/> ** KT/V as markers of adequate solute clearance, routine haematology and biochemistry<br/> \$ Will be monitored every two weeks for the first six weeks<br/> MoCA – Montreal Cognitive Assessment tool, CAM – Confusion Assessment Method, QoL – quality of life, ADL – activities of daily living, HADS – Hospital Anxiety and Depression Scale</p> |                                          |          |                           |

**Box 1: Questionnaire to assess patient experience of low temperature dialysis**

1) Has this low temperature dialysis session caused you any more discomfort than your usual dialysis session - Yes/No/Not Sure

\* If yes, please specify severity of your discomfort

1 2 3 4 5 6 7 8 9 10

( 1= minimum, 10= severe)

2) Did you feel cold during dialysis? - Yes/No/Not Sure

3) Did you feel any numbness or pain in your hands and feet? - Yes/No/Not Sure

4) Was your recovery time after dialysis shorter than usual? - Yes/No/Not Sure

5) Do you feel more energetic than your usual dialysis session? - Yes/No/ Not Sure

6) Did you feel sleepier than your usual dialysis? - Yes/No/Not Sure

7) Did you feel more tired than usual dialysis? - Yes/No/Not Sure

8) Did you feel that your concentration was worse than usual? - Yes/No/Not Sure

9) Will you prefer to have low temperature dialysis in the future? - Yes/No/Not Sure

10) If we develop a research project looking at the effect of low temperature dialysis on brain functions; would you be prepared to consider taking part?  
- Yes/No/Not Sure
